# Supplementary material for: Survival strategies of Antarctic vegetation during extensive glacial expansion across the Oligocene/Miocene Transition
Source: Copernicus journal article supplement (doi:10.5194/egusphere-2024-4021), 2025-01-09
Supplement: Supplementary file 1 [file egusphere-2024-4021-supplement.zip]

## Sheet: n-alkane indices
Supplementary data table 1: n-alkane abundances and indices
DSDP 270				n-Alkanes in sediment (ug/g TOC)
Depth (mbsf)	Age (Ma)	n-C25 - n-C33 CPI	n-C25 - n-C33 ACL	n-C15	n-C16	n-C17	n-C18	n-C19	n-C20	n-C21	n-C22	n-C23	n-C24	n-C25	n-C26	n-C27	n-C28	n-C29	n-C30	n-C31	n-C32	n-C33	n-C34	n-C35
27.8	19.7978	2.64908	27.9973	0	356.85	599.468	286.821	253.691	127.136	37.754	8.67219	8.02725	3.91405	12.0976	3.87037	18.8701	9.0033	16.2168	4.44246	8.5049	2.92351	2.65427	0	0
37.7	19.8857	3.68695	27.8571	91.4211	499.663	603.986	273.548	264.663	137.509	45.4204	10.6024	6.17671	2.85739	8.49698	2.90742	12.6276	3.00909	9.55708	1.40575	5.32522	1.60452	1.4465	0	0
47.8	19.9754	2.81431	28.0187	20.7462	119.081	137.356	60.8904	62.1799	37.115	19.2396	6.5766	9.20975	4.67369	15.8814	5.18481	25.6703	10.9692	20.9413	9.47047	12.2043	0	3.445	0	0
57.3	20.0598	3.63596	28.0379	0	1.1056	10.2647	14.2336	17.6556	14.5979	7.87686	3.56762	6.03118	2.81417	9.79307	3.16595	15.651	4.03882	13.3668	2.24411	7.36071	2.32359	2.28357	0.494557	0.542885
66.8	20.1442	3.08351	27.8862	17.745	89.122	111.611	55.0663	57.7383	37.6794	21.7704	8.72516	10.6471	4.75829	17.2459	4.95706	25.7881	9.77802	20.2933	8.21327	10.9897	0	3.09146	0	0
83.2	20.3017	3.1565	27.7868	109.001	883.211	1232.35	636.188	688.435	420.288	161.955	46.4079	26.1179	11.3439	31.8513	9.08188	45.6662	16.8012	34.7772	6.51953	17.1621	5.34134	5.24643	0	0
94.2	20.4145	3.24501	27.5667	3.37488	40.7024	105.635	71.941	88.1207	63.2244	32.8431	13.5538	19.7966	8.30406	26.7636	6.84717	34.6159	11.1396	23.7349	5.99303	10.8372	2.96069	3.14474	0	0
103.3	20.5078	4.35577	27.773	1.77407	14.5941	23.0865	13.1895	14.1661	9.56829	7.54478	3.65191	9.12363	3.6739	13.4589	3.54183	18.3925	3.59931	14.3168	1.78462	7.12163	2.21449	2.10321	0	0
112.8	20.6052	3.27307	27.6711	0	0	4.42599	7.83255	12.1413	9.5027	8.8208	5.30884	15.9787	6.97608	26.2236	6.97911	37.8012	13.0231	27.2897	6.35743	12.3184	3.22239	3.40378	0	0
122.3	22.9304	3.6055	27.6459	0	16.5564	21.9873	11.3787	10.1132	7.29456	14.7213	11.1115	39.1104	16.4555	61.1325	15.705	85.0955	24.0534	60.4836	20.2045	27.8118	0	7.75873	0	0
132.7	22.9748	4.32136	27.6254	0	0.686715	9.74823	12.3332	17.6032	12.7649	6.24938	3.10272	9.1074	4.27482	18.8959	4.65477	27.8046	5.38909	19.3053	2.89944	8.46267	2.91836	2.21513	0	0
141.7	23.0131	4.11604	27.7525	8.06325	53.768	80.8535	38.3614	38.7415	22.2594	23.0212	13.6251	51.1506	22.3313	89.4298	24.7562	127.779	30.8007	94.9824	25.2197	47.2692	0	13.3964	0	0
146.2	23.0323	3.62977	27.8103	19.9457	147.657	201.756	83.4396	79.1554	45.3801	24.0586	8.08092	16.05	7.52837	30.2256	8.49116	42.2204	12.3594	32.2871	10.774	17.4078	0	4.85843	0	0
153.2	23.8135	3.46435	27.7503	0	77.9405	110.145	46.7685	46.8025	27.4838	17.9942	9.28383	18.4857	9.76221	27.0793	7.96709	35.8397	10.2044	26.0319	8.80239	14.9693	0	3.84527	0	0
160.3	23.8437	3.95511	27.8507	0	14.6949	67.3122	54.6429	71.6049	48.8643	17.9684	4.75449	4.9412	2.4512	8.80259	2.82969	15.2615	3.21816	10.2986	1.63519	5.86122	1.78395	1.51086	0	0
173.7	23.9008	2.7488	28.0083	0	0	14.5506	25.1439	45.3433	39.688	18.8975	6.41928	10.5853	4.59532	15.3833	4.87451	21.697	10.1011	18.4274	4.7924	11.4485	3.63721	3.1311	0	0
183.2	23.9413	2.47335	27.9089	0	22.5275	100.738	86.1263	120.792	95.6545	43.0559	12.8	6.60551	2.38884	6.69039	2.34833	9.36998	5.15717	7.33223	1.85485	4.66544	1.35049	1.09148	0	0
194.8	23.9908	4.09715	27.9612	0	58.6788	137.333	92.3456	116.368	88.2249	48.9491	17.4907	11.2802	5.04835	13.9544	4.85684	22.9517	5.33975	15.7933	2.32471	10.4034	1.17324	3.04933	0.486398	0
200.2	24.3012	3.47015	28.0232	6.87664	124.032	231.36	128.732	151.69	104.271	43.2215	11.8935	5.25837	1.94131	4.60508	1.79972	10.506	2.58917	7.90796	1.36773	4.11995	1.47943	0.941088	0	0
208.7	24.3374	3.62608	27.971	2.99632	32.6694	80.6898	56.3643	67.3478	42.0724	14.4146	4.18627	4.10067	1.93553	5.55477	1.94228	11.1035	2.4753	8.20599	1.42674	4.40331	1.67155	1.09456	0	0
236.3	24.4551	2.49127	27.8007	0	18.5626	110.76	97.9551	139.788	113.774	56.0506	18.0129	12.6128	4.99258	15.1214	4.84451	24.8638	12.0967	16.7414	5.49719	9.23316	2.74265	2.43122	0	0
248.2	24.7772	4.20653	27.7484	7.13059	88.7759	190.232	101.439	97.5669	55.6417	23.0903	6.99159	11.1116	4.62858	16.2159	4.81169	23.9719	4.98774	17.0963	2.7898	9.25756	1.73538	2.09629	0	0
259.2	24.8241	3.02423	27.89	8.60405	34.5554	47.8885	25.6891	31.0067	19.8615	13.6788	4.82555	8.90605	4.00246	15.359	4.30445	23.2823	9.48741	17.64	7.34782	10.9089	0	2.26992	0	0
269.7	24.8689	2.57461	27.8953	0	5.51177	20.1585	15.2252	17.866	10.8254	10.8578	5.23412	13.7134	7.22523	23.4289	7.7424	35.0088	15.7121	26.2874	14.0939	17.0804	0	3.35147	0	0
283.8	24.929	3.58691	27.997	0	4.57995	21.1579	13.7337	13.014	7.90566	6.44813	3.06836	7.13816	3.22679	12.21	3.77189	19.0785	5.8467	15.7282	3.21143	9.71938	2.12496	2.1296	0	0
296.7	24.9839	3.7411	27.8702	1.74727	35.0608	78.8839	49.8435	54.8902	37.7569	17.5242	6.47121	10.1177	4.63598	16.7117	4.72402	25.5846	7.52123	19.4604	3.60456	11.1492	2.27833	2.60197	0	0
307.3	25.1514	2.36461	27.9027	0	5.13146	23.8321	16.9303	17.8339	11.4841	8.83287	4.07338	8.84668	3.93398	14.3085	4.15546	21.9541	12.001	16.8142	7.62613	10.3162	2.10668	2.14769	0	0
318.7	25.2196	2.57067	27.9062	0	2.87079	18.8746	15.411	15.8819	9.55443	8.60417	4.21133	10.2479	4.65947	17.083	5.27774	26.8221	13.1767	20.8834	7.88976	12.2484	2.47707	2.59411	0	0
331.3	25.3215	3.17045	27.9872	0	2.19056	15.0284	16.51	18.892	15.1303	11.3828	5.35372	11.1453	5.16581	19.8775	5.89157	30.4332	12.3586	24.9642	6.17769	15.8039	2.97875	3.29608	0	0
345.3	25.4401	2.86349	27.8544	0	36.0209	120.404	76.3531	76.0499	44.8976	18.4322	6.24564	9.60519	4.40967	15.8944	4.88253	25.2648	10.8227	18.635	5.51714	11.0471	2.23852	2.10967	0	0

## Sheet: n-alkane carbon CSI
Supplementary data table 2: n-alkane compound specific carbon isotopes
	BMC: 396			BMC: 397			BMC: 398
	Sample depth (mbsf): 368.2			Sample depth (mbsf): 379.7			Sample depth (mbsf): 355.7
n-alkane	Rep 1 δ13C	Rep 2 δ13C	Mean δ13C	Rep 1 δ13C	Rep 2 δ13C	Mean δ13C	Rep 1 δ13C	Rep 2 δ13C	Mean δ13C
C23	-29.1347	-28.9784	-29.0565	-29.9457	-30.0479	-29.9968	N/A	N/A
C24	-27.3191	-27.1674	-27.2433	-26.4669	-29.2823	-27.8746	N/A	N/A
C25	-27.3562	-27.6805	-27.5183	-28.4928	-27.8655	-28.1792	-28.0705	-27.8069	-27.9387
C26	-29.757	-28.2911	-29.024	-30.6652	-30.1893	-30.4273	-26.7283	-26.503	-26.6156
C27	-29.1903	-28.8016	-28.996	-30.1944	-29.9571	-30.0757	-28.2035	-27.7658	-27.9847
C28	-28.142	-28.9278	-28.5349	-32.5929	-30.548	-31.5704	-27.3322	-26.1965	-26.7643
C29	-29.1367	-28.9022	-29.0195	-29.8395	-30.2766	-30.0581	-27.3	-26.6629	-26.9815
C30	-23.9633	-24.0637	-24.0135	N/A	N/A		N/A	N/A
C31	-29.1072	-27.9706	-28.5389	-30.0612	-29.5953	-29.8283	-26.477	-25.1865	-25.8318
	BMC: 399			BMC: 400			BMC: 401
	Sample depth (mbsf): 259.2			Sample depth (mbsf): 66.8			Sample depth (mbsf): 153.2
n-alkane	Rep 1 δ13C	Rep 2 δ13C	Mean δ13C	Rep 1 δ13C	Rep 2 δ13C	Mean δ13C	Rep 1 δ13C	Rep 2 δ13C	Mean δ13C
C23	-28.4423	-28.4261	-28.4342	-28.4651	-28.6641	-28.5646	N/A	N/A
C24	-28.3511	-28.4237	-28.3874	-28.6739	-28.0506	-28.3623	-28.3043	-29.1436	-28.724
C25	-27.102	-27.8055	-27.4537	-28.4369	-28.561	-28.499	-29.0897	-29.5087	-29.2992
C26	-27.4147	-27.2708	-27.3428	-28.7066	-29.8003	-29.2534	-29.424	-29.8746	-29.6493
C27	-28.5767	-28.5849	-28.5808	-29.1982	-29.593	-29.3956	-30.2567	-30.2381	-30.2474
C28	-27.2489	-26.5888	-26.9189	-29.7449	-30.1436	-29.9442	-29.9587	-30.6772	-30.318
C29	-27.3997	-27.901	-27.6504	-30.1646	-30.0418	-30.1032	-31.3445	-31.6375	-31.491
C30	N/A	N/A		N/A	N/A		-24.668	-25.5364	-25.1022
C31	N/A	N/A		N/A	N/A		-30.6825	-30.6971	-30.6898
	BMC: 402			BMC: 403			BMC: 404
	Sample depth (mbsf): 269.7			Sample depth (mbsf): 122.3			Sample depth (mbsf): 146.2
n-alkane	Rep 1 δ13C	Rep 2 δ13C	Mean δ13C	Rep 1 δ13C	Rep 2 δ13C	Mean δ13C	Rep 1 δ13C	Rep 2 δ13C	Mean δ13C
C23	-28.7828	-28.6314	-28.7071	-28.6692	-29.1244	-28.8968	-29.1792	-29.3449	-29.262
C24	-28.4851	-28.3566	-28.4209	-29.035	-29.6867	-29.3609	-29.6974	-29.1955	-29.4465
C25	-27.3369	-27.41	-27.3734	-29.5501	-29.6576	-29.6039	-30.2128	-30.3627	-30.2877
C26	-28.0248	-27.356	-27.6904	-29.2755	-30.0326	-29.6541	-29.0012	-29.3697	-29.1855
C27	-29.0485	-29.0069	-29.0277	-30.0884	-30.4701	-30.2792	-30.4498	-30.7545	-30.6022
C28	-28.8222	-28.2239	-28.523	N/A	N/A		-30.6742	-30.4571	-30.5656
C29	-28.1387	-27.6654	-27.9021	-30.5137	-30.4137	-30.4637	-31.3109	-31.302	-31.3065
C30	N/A	N/A		N/A	N/A		-23.9484	-24.4849	-24.2167
C31	N/A	N/A		-31.495	-31.0711	-31.283	-30.3243	-30.7895	-30.5569
	BMC: 405			BMC: 406			BMC: 408
	Sample depth (mbsf): 141.7			Sample depth (mbsf): 47.8			Sample depth (mbsf): 345.3
n-alkane	Rep 1 δ13C	Rep 2 δ13C	Mean δ13C	Rep 1 δ13C	Rep 2 δ13C	Mean δ13C	Rep 1 δ13C	Rep 2 δ13C	Mean δ13C
C23	-27.6773	-27.5573	-27.6173	N/A	N/A		-29.4396	-29.5827	-29.5112
C24	-29.0499	-29.0454	-29.0476	-28.2356	-28.9405	-28.5881	-27.3735	-27.9939	-27.6837
C25	-29.7344	-29.9173	-29.8258	-27.9674	-28.4683	-28.2178	-27.5165	-27.6955	-27.606
C26	-29.6083	-29.0866	-29.3475	-28.0706	-28.7415	-28.406	-27.4161	-27.722	-27.569
C27	-30.4074	-30.2078	-30.3076	-29.5478	-29.4023	-29.4751	-29.6183	-29.7972	-29.7077
C28	-31.3782	-31.3912	-31.3847	-28.7187	-29.4942	-29.1065	-28.3513	-28.8374	-28.5944
C29	-31.4572	-31.544	-31.5006	-30.3286	-30.11	-30.2193	-28.1659	-28.1441	-28.155
C30	N/A	N/A		N/A	N/A		N/A	N/A
C31	-30.4427	-30.7505	-30.5966	-30.4999	-29.9396	-30.2197	-25.8276	-25.8692	-25.8484
	BMC: 409			BMC: 410			BMC: 411
	Sample depth (mbsf): 83.2			Sample depth (mbsf): 236.3			Sample depth (mbsf): 112.8
n-alkane	Rep 1 δ13C	Rep 2 δ13C	Mean δ13C	Rep 1 δ13C	Rep 2 δ13C	Mean δ13C	Rep 1 δ13C	Rep 2 δ13C	Mean δ13C
C23	-29.3553	-31.8754	-30.6153	N/A	N/A		-28.8008	-28.6315	-28.7161
C24	-27.0453	-26.9154	-26.9804	N/A	N/A		-28.5949	-30.4619	-29.5284
C25	-26.7116	-26.9961	-26.8539	-27.1754	-27.752	-27.4637	-29.3532	-28.7412	-29.0472
C26	-33.0612	-30.5539	-31.8076	-27.8313	N/A	-27.8313	-30.8739	-30.9042	-30.889
C27	-29.2224	-28.9396	-29.081	-29.3637	-29.411	-29.3873	-30.0336	-30.0497	-30.0416
C28	N/A	-27.3068	-27.3068	-28.7954	-28.3326	-28.564	-29.4223	-30.2685	-29.8454
C29	-29.3246	-29.0343	-29.1795	-29.3349	-28.8359	-29.0854	-30.3305	-30.4118	-30.3712
C30	N/A	N/A		N/A	N/A		N/A	N/A
C31	N/A	N/A		-28.486	-29.6895	-29.0878	-29.8313	-29.9252	-29.8782
	BMC: 412			BMC: 413			BMC: 414
	Sample depth (mbsf): 173.7			Sample depth (mbsf): 27.8			Sample depth (mbsf): 94.2
n-alkane	Rep 1 δ13C	Rep 2 δ13C	Mean δ13C	Rep 1 δ13C	Rep 2 δ13C	Mean δ13C	Rep 1 δ13C	Rep 2 δ13C	Mean δ13C
C23	N/A	N/A		N/A	N/A		-28.6053	-28.8845	-28.7449
C24	-27.4104	-26.9945	-27.2025	N/A	N/A		-28.7497	-29.4087	-29.0792
C25	-27.3608	-28.081	-27.7209	-27.9512	-28.3246	-28.1379	-28.844	-28.6177	-28.7308
C26	-29.6047	-30.0595	-29.8321	-29.115	-28.415	-28.765	-36.7551	-30.5037	-33.6294
C27	-29.7957	-29.9733	-29.8845	-29.3432	-28.7802	-29.0617	-29.8374	-30.2436	-30.0405
C28	-31.248	-30.6637	-30.9559	-30.156	-29.5965	-29.8762	-29.4016	-31.2544	-30.328
C29	-29.8445	-30.6134	-30.229	-29.7649	-30.3766	-30.0708	-30.6978	-30.2426	-30.4702
C30	N/A	N/A		N/A	N/A		N/A	N/A
C31	-30.3834	-30.0017	-30.1925	-37.9257	-38.3373	-38.1315	N/A	N/A
	BMC: 415			BMC: 416			BMC: 417
	Sample depth (mbsf): 183.2			Sample depth (mbsf): 318.7			Sample depth (mbsf): 331.3
n-alkane	Rep 1 δ13C	Rep 2 δ13C	Mean δ13C	Rep 1 δ13C	Rep 2 δ13C	Mean δ13C	Rep 1 δ13C	Rep 2 δ13C	Mean δ13C
C23	N/A	N/A		-26.6599	-28.069	-27.3644	-27.8959	-28.4445	-28.1702
C24	N/A	N/A		-28.7792	-27.5365	-28.1578	-27.9885	-28.2773	-28.1329
C25	-27.535	-28.877	-28.206	-26.3493	-26.9475	-26.6484	-27.2379	-27.1554	-27.1966
C26	N/A	N/A		-26.7787	-32.4738	-29.6263	-27.646	-27.8274	-27.7367
C27	-28.919	-31.6071	-30.2631	-28.5522	-28.087	-28.3196	-28.0408	-28.6303	-28.3355
C28	N/A	N/A		-27.9698	-27.7876	-27.8787	-27.6115	-27.9327	-27.7721
C29	-30.5511	-30.3762	-30.4637	-26.9551	-27.2761	-27.1156	-27.137	-27.3312	-27.2341
C30	N/A	N/A		N/A	N/A		-23.2952	-23.9805	-23.6378
C31	-29.9272	-28.6795	-29.3033	-26.3221	-25.2554	-25.7887	-25.3144	-25.4827	-25.3985
	BMC: 418			BMC: 419			BMC: 420
	Sample depth (mbsf): 307.3			Sample depth (mbsf): 296.7			Sample depth (mbsf): 132.7
n-alkane	Rep 1 δ13C	Rep 2 δ13C	Mean δ13C	Rep 1 δ13C	Rep 2 δ13C	Mean δ13C	Rep 1 δ13C	Rep 2 δ13C	Mean δ13C
C23	-28.546	-28.184	-28.365	-28.606	-28.942	-28.774	-29.5082	-29.6128	-29.5605
C24	-28.1021	-28.2331	-28.1676	-28.4003	-27.7567	-28.0785	-32.4407	-30.2653	-31.353
C25	-26.5684	-27.3591	-26.9637	-27.3331	-27.3901	-27.3616	-30.3271	-30.1305	-30.2288
C26	-27.6859	-27.9297	-27.8078	-28.8582	-28.2139	-28.5361	-30.0036	-30.1778	-30.0907
C27	-28.6297	-28.7714	-28.7006	-29.5189	-29.1669	-29.3429	-30.2972	-30.5964	-30.4468
C28	-26.4598	-27.7208	-27.0903	-29.4568	-29.1301	-29.2935	-31.1728	-30.6343	-30.9036
C29	-26.9286	-27.688	-27.3083	-27.9796	-28.0383	-28.0089	-31.3143	-31.0539	-31.1841
C30	N/A	N/A		-20.307	-20.5969	-20.452	-28.2103	-28.0301	-28.1202
C31	N/A	N/A		-25.7026	-25.9988	-25.8507	-30.8837	-30.3775	-30.6306
	BMC: 421			BMC: 422			BMC: 423
	Sample depth (mbsf): 200.2			Sample depth (mbsf): 283.8			Sample depth (mbsf): 160.3
n-alkane	009934sr	Rep 2 δ13C	Mean δ13C	Rep 1 δ13C	Rep 2 δ13C	Mean δ13C	Rep 1 δ13C	Rep 2 δ13C	Mean δ13C
C23	N/A	N/A		-28.5441	-27.9623	-28.2532	-29.727	-29.8331	-29.7801
C24	N/A	N/A		-28.6871	-27.306	-27.9966	-29.8812	-28.8116	-29.3464
C25	N/A	N/A		-26.8987	-26.6145	-26.7566	-29.61	-29.6783	-29.6441
C26	N/A	-26.7979	-26.7979	-27.403	-27.7433	-27.5732	-30.2784	-30.6445	-30.4614
C27	-30.9866	-29.6073	-30.297	-28.3636	-28.1239	-28.2437	-30.0508	-30.1552	-30.103
C28	-29.8205	-29.2256	-29.5231	-28.054	-28.1755	-28.1148	-30.5618	-30.3445	-30.4532
C29	-29.807	-29.9474	-29.8772	-27.3602	-27.016	-27.1881	-31.0359	-30.837	-30.9365
C30	N/A	N/A		N/A	N/A		-25.8232	-25.8279	-25.8255
C31	N/A	N/A		-32.5892	-32.8427	-32.716	-30.6974	-30.6387	-30.6681
	BMC: 424			BMC: 425			BMC: 426
	Sample depth (mbsf): 37.7			Sample depth (mbsf): 16.7			Sample depth (mbsf): 57.3
n-alkane	Rep 1 δ13C	Rep 2 δ13C	Mean δ13C	Rep 1 δ13C	Rep 2 δ13C	Mean δ13C	Rep 1 δ13C	Rep 2 δ13C	Mean δ13C
C23	-28.6723	-29.0772	-28.8748	N/A	N/A		-29.6726	-29.8053	-29.7389
C24	-29.0145	-29.8523	-29.4334	N/A	N/A		-28.0972	-28.4266	-28.2619
C25	-27.7768	-28.4445	-28.1107	-26.9371	-26.9696	-26.9534	-29.1354	-28.745	-28.9402
C26	-29.0221	-30.2733	-29.6477	-29.2061	-29.147	-29.1766	-27.7269	-29.6122	-28.6695
C27	-29.4963	-29.6146	-29.5555	-28.9932	-29.1836	-29.0884	-29.9975	-30.2437	-30.1206
C28	-30.3008	-30.8734	-30.5871	-29.4861	-29.2417	-29.3639	-30.9308	-31.4736	-31.2022
C29	-29.9672	-30.6016	-30.2844	-29.7456	-30.4938	-30.1197	-30.9685	-31.5366	-31.2526
C30	N/A	N/A		N/A	-27.2132	-27.2132	-26.1234	-25.8061	-25.9647
C31	-30.4069	-30.7151	-30.561	-30.2343	-30.1481	-30.1912	-31.3545	-31.5021	-31.4283
	BMC: 427			BMC: 428			BMC: 429
	Sample depth (mbsf): 103.3			Sample depth (mbsf): 248.2			Sample depth (mbsf): 208.7
n-alkane	Rep 1 δ13C	Rep 2 δ13C	Mean δ13C	Rep 1 δ13C	Rep 2 δ13C	Mean δ13C	Rep 1 δ13C	Rep 2 δ13C	Mean δ13C
C23	-28.0146	-28.0999	-28.0572	-29.7293	-29.4796	-29.6045	-29.2595	-30.373	-29.8163
C24	-29.2518	-30.052	-29.6519	-29.4651	-27.7218	-28.5935	-27.2107	-28.7266	-27.9687
C25	-28.9739	-29.0175	-28.9957	-27.2698	-27.3734	-27.3216	-28.0734	-27.4988	-27.7861
C26	-28.9092	-28.8807	-28.895	-26.4734	-28.3036	-27.3885	-26.3001	-26.503	-26.4016
C27	-30.3067	-30.3502	-30.3284	-28.7182	-28.9871	-28.8527	-29.1999	-29.2079	-29.2039
C28	-31.4802	-32.0552	-31.7677	-27.2089	-28.4485	-27.8287	-27.529	-29.4537	-28.4913
C29	-30.3421	-30.431	-30.3866	-28.5576	-28.6231	-28.5904	-29.677	-29.7634	-29.7202
C30	N/A	N/A		N/A	N/A		-25.8638	-26.0756	-25.9697
C31	N/A	N/A		-25.5205	-26.3875	-25.954	-33.5546	-34.0318	-33.7932
	BMC: 462
	Sample depth (mbsf): 194.8
n-alkane	Rep 1 δ13C	Rep 2 δ13C	Mean δ13C
C23	-29.365	-29.425	-29.395
C24	-32.807	-30.365	-31.586
C25	-30.658	-31.122	-30.89
C26	-31.51	-30.523	-31.0165
C27	-27.689	-27.375	-27.532
C28	-29.457	-28.729	-29.093
C29	-27.587	-27.743	-27.665
C30	-36.221	-35.555	-35.888
C31	-26.411	-30.302	-28.3565

## Sheet: n-alkane hydrogen CSI
Supplementary data table 3: n-alkane compound specific carbon isotopes
n-alkane	BMC: 396			BMC: 397				BMC: 398
	Sample depth (mbsf): 368.2			Sample depth (mbsf): 379.7				Sample depth (mbsf): 355.7
	Rep 1 δD	Rep 2 δD	Mean δD	Rep 1 δD	Rep 2 δD	Rep 3 δD	Mean δD	Rep 1 δD	Rep 2 δD	Rep 3 δD	Mean δD
C23	-165.275	-177.282	-171.279	N/A	N/A	N/A		N/A	N/A	N/A
C24	-183.559	-169.821	-176.69	N/A	N/A	N/A		N/A	N/A	N/A
C25	-187.941	-181.081	-184.511	-177.65	-179.569	-162.698	-173.306	-155.921	-150.691	-146.156	-150.923
C26	-136.535	-155.885	-146.21	-181.15	N/A	N/A	-181.15	N/A	N/A	N/A
C27	-191.37	-187.609	-189.49	-196.27	-192.123	-194.555	-194.316	-172.761	-157.873	-157.824	-162.819
C28	-180.257	-191.485	-185.871	-171.856	N/A	N/A	-171.856	N/A	N/A	-171.154	-171.154
C29	-198.179	-201.048	-199.613	-181.932	-172.961	-188.417	-181.103	-179.102	-182.522	-171.123	-177.582
C30	-178.027	-184.435	-181.231	N/A	N/A	N/A		N/A	N/A	N/A
C31	-207.467	-170.449	-188.958	-187.008	-150.855	-177.955	-171.939	-174.125	-190.942	-165.056	-176.708
n-alkane	BMC: 399				BMC: 400				BMC: 401
	Sample depth (mbsf): 259.2				Sample depth (mbsf): 66.8				Sample depth (mbsf): 153.2
	Rep 1 δD	Rep 2 δD	Rep 3 δD	Mean δD	Rep 1 δD	Rep 2 δD	Rep 3 δD	Mean δD	Rep 1 δD	Rep 2 δD	Mean δD
C23	N/A	N/A	N/A		-148.383	-153.466	-151.14	-150.996	-199.299	-148.111	-173.705
C24	N/A	N/A	N/A		-179.356	-173.165	-171.281	-174.601	-177.647	N/A	-177.647
C25	-181.287	-164.172	-169.853	-171.771	-175.87	-182.947	-174	-177.606	-173.248	-176.993	-175.12
C26	N/A	N/A	-167.711	-167.711	-199.198	-190.378	-165.731	-185.102	-183.662	-169.378	-176.52
C27	-187.582	-187.16	-181.179	-185.307	-178.326	-180.035	-176.514	-178.292	-173.675	-170.79	-172.233
C28	N/A	N/A	-184.806	-184.806	N/A	-152.451	-161.122	-156.786	N/A	-151.735	-151.735
C29	-191.976	-182.867	-194.893	-189.912	-199.645	-199.188	-196.405	-198.413	-181.652	-195.267	-188.459
C30	N/A	N/A	N/A		N/A	-189.112	N/A	-189.112	N/A	N/A
C31	-179.583	-178.21	-188.144	-181.979	-180.213	N/A	-186.874	-183.543	-174.909	-184.018	-179.464
n-alkane	BMC: 402			BMC: 403			BMC: 404
	Sample depth (mbsf): 269.7			Sample depth (mbsf): 122.3			Sample depth (mbsf): 146.2
	Rep 1 δD	Rep 2 δD	Mean δD	Rep 1 δD	Rep 2 δD	Mean δD	Rep 1 δD	Rep 2 δD	Mean δD
C23	-182.018	-168.211	-175.115	-185.212	-181.037	-183.125	-169.64	N/A	-169.64
C24	-171.567	-176.562	-174.065	-190.311	-192.091	-191.201	-169.12	-168.316	-168.718
C25	-182.429	-173.128	-177.779	-174.433	-174.326	-174.38	-176.864	-177.865	-177.365
C26	-151.421	-147.436	-149.428	-150.338	-155.983	-153.161	-164.335	-159.817	-162.076
C27	-181.492	-188.357	-184.924	-177.872	-180.979	-179.425	-177.569	-177.505	-177.537
C28	-156.458	-173.294	-164.876	-179.02	N/A	-179.02	-176.35	-183.37	-179.86
C29	-190.967	-193.988	-192.478	-172.016	-181.799	-176.907	-191.144	-198.249	-194.697
C30	N/A	N/A		N/A	N/A		N/A	N/A
C31	-172.716	-188.117	-180.416	-184.198	-193.253	-188.726	-167.427	-180.784	-174.106
n-alkane	BMC: 405			BMC: 406			BMC: 408
	Sample depth (mbsf): 141.7			Sample depth (mbsf): 47.8			Sample depth (mbsf): 345.3
	Rep 1 δD	Rep 2 δD	Mean δD	Rep 1 δD	Rep 2 δD	Mean δD	Rep 1 δD	Rep 2 δD	Mean δD
C23	-182.133	-176.54	-179.337	-185.887	-180.795	-183.341	-154.533	-159.286	-156.909
C24	-198.861	-168.749	-183.805	-185.96	-193.487	-189.724	-170.307	-170.892	-170.599
C25	-184.06	-178.203	-181.132	-196.651	-190.773	-193.712	-182.237	-182.789	-182.513
C26	-159.003	-170.403	-164.703	-160.216	-167.413	-163.815	-177.973	-176.486	-177.23
C27	-163.332	-184.354	-173.843	-189.451	-191.828	-190.639	-196.473	-196.071	-196.272
C28	-155.841	-175.729	-165.785	-186.321	-172.526	-179.423	-179.112	-195.06	-187.086
C29	-175.944	-188.996	-182.47	-206.095	-203.022	-204.558	-200.814	-203.478	-202.146
C30	N/A	N/A		N/A	N/A		N/A	N/A
C31	-191.336	-188.354	-189.845	-203.559	-200.709	-202.134	-200.814	-185.75	-193.282
n-alkane	BMC: 409			BMC: 410			BMC: 411
	Sample depth (mbsf): 83.2			Sample depth (mbsf): 236.3			Sample depth (mbsf): 112.8
	Rep 1 δD	Rep 2 δD	Mean δD	Rep 1 δD	Rep 2 δD	Mean δD	Rep 1 δD	Rep 2 δD	Mean δD
C23	N/A	N/A		N/A	N/A		-186.327	-187.625	-186.976
C24	N/A	N/A		N/A	N/A		-181.902	-179.932	-180.917
C25	-158.999	-153.656	-156.327	-165.458	-167.945	-166.702	-188.251	-188.2	-188.226
C26	N/A	N/A		-166.697	-182.898	-174.798	-173.181	-160.419	-166.8
C27	-178.393	-169.2	-173.796	-182.848	-176.972	-179.91	-192.613	-192.629	-192.621
C28	-172.513	-197.164	-184.839	N/A	N/A		-175.162	-175.511	-175.337
C29	-196.666	-180.149	-188.407	-197.709	-195.252	-196.481	-208.035	-204.788	-206.411
C30	N/A	N/A		N/A	N/A		N/A	N/A
C31	-177.368	-192.258	-184.813	-170.909	-178.308	-174.608	-211.183	-203.334	-207.258
n-alkane	BMC: 412			BMC: 413			BMC: 414
	Sample depth (mbsf): 173.7			Sample depth (mbsf): 27.8			Sample depth (mbsf): 94.2
	Rep 1 δD	Rep 2 δD	Mean δD	Rep 1 δD	Rep 2 δD	Mean δD	Rep 1 δD	Rep 2 δD	Mean δD
C23	-148.476	-142.895	-145.685	N/A	N/A		N/A	N/A
C24	-171.253	-156.978	-164.115	N/A	N/A		N/A	N/A
C25	-189.23	-186.313	-187.772	N/A	N/A		-183.421	-168.05	-175.736
C26	-179.31	-173.591	-176.451	N/A	N/A		-166.669	-160.068	-163.369
C27	-183.152	-184.771	-183.962	-167.332	-169.483	-168.407	-180.994	-182.998	-181.996
C28	-162.341	-187.402	-174.871	N/A	N/A		N/A	N/A
C29	-202.755	-198.665	-200.71	-192.271	-189.603	-190.937	-191.188	-189.862	-190.525
C30	-197.284	-197.951	-197.618	N/A	N/A		N/A	N/A
C31	-202.332	-195.187	-198.76	-184.882	-185.139	-185.011	-199.681	-204.543	-202.112
n-alkane	BMC: 415			BMC: 416			BMC: 417
	Sample depth (mbsf): 183.2			Sample depth (mbsf): 318.7			Sample depth (mbsf): 331.3
	Rep 1 δD	Rep 2 δD	Mean δD	Rep 1 δD	Rep 2 δD	Mean δD	Rep 1 δD	Rep 2 δD	Mean δD
C23	N/A	N/A		-164.852	-168.062	-166.457	-164.021	-161.791	-162.906
C24	N/A	N/A		-168.384	-160.335	-164.359	-168.175	-171.524	-169.85
C25	N/A	N/A		-189.89	-179.351	-184.62	-177.282	-177.252	-177.267
C26	N/A	N/A		-165.227	-185.811	-175.519	-178.283	-175.327	-176.805
C27	-163.149	-163.23	-163.19	-180.452	-183.123	-181.787	-185.613	-183.697	-184.655
C28	-181.167	N/A	-181.167	-174.913	-171.963	-173.438	-178.444	-160.941	-169.692
C29	-179.695	-179.157	-179.426	-187.154	-198.609	-192.882	-191.013	-195.102	-193.058
C30	N/A	N/A		N/A	N/A		N/A	N/A
C31	-191.146	-188.451	-189.798	-178.117	-180.784	-179.45	-187.142	-188.171	-187.656
n-alkane	BMC: 418			BMC: 419			BMC: 420
	Sample depth (mbsf): 307.3			Sample depth (mbsf): 296.7			Sample depth (mbsf): 132.7
	Rep 1 δD	Rep 2 δD	Mean δD	Rep 1 δD	Rep 2 δD	Mean δD	Rep 1 δD	Rep 2 δD	Mean δD
C23	-170.793	-168.709	-169.751	N/A	N/A		-162.777	-171.79	-167.284
C24	-180.643	-182.308	-181.476	-162.308	-158.244	-160.276	-172.187	-176.294	-174.24
C25	-177.007	-172.371	-174.689	-163.051	-167.143	-165.097	-178.18	-178.675	-178.428
C26	-190.077	-164.422	-177.25	-170.461	-170.261	-170.361	-161.638	-171.438	-166.538
C27	-190.031	-192.851	-191.441	-181.514	-186.663	-184.089	-186.38	-193.491	-189.935
C28	-194.876	-192.229	-193.553	-169.296	-171.697	-170.496	-173.624	-175.504	-174.564
C29	-202.038	-203.857	-202.947	-192.913	-197.638	-195.276	-196.892	-198.334	-197.613
C30	N/A	N/A		N/A	N/A		N/A	N/A
C31	-202.21	-207.443	-204.827	-204.16	-192.486	-198.323	-202.911	-192.674	-197.793
n-alkane	BMC: 421			BMC: 422			BMC: 423
	Sample depth (mbsf): 200.2			Sample depth (mbsf): 283.8			Sample depth (mbsf): 160.3
	Rep 1 δD	Rep 2 δD	Mean δD	Rep 1 δD	Rep 2 δD	Mean δD	Rep 1 δD	Rep 2 δD	Mean δD
C23	N/A	N/A		-170.258	-171.268	-170.763	N/A	N/A
C24	N/A	N/A		-177.007	-180.174	-178.591	N/A	N/A
C25	-156.161	-155.3	-155.731	-175.375	-175.753	-175.564	-164.397	-160.135	-162.266
C26	N/A	N/A		-173.899	-178.348	-176.124	-180.264	-153.433	-166.849
C27	-175.578	-180.993	-178.286	-185.494	-188.189	-186.841	-177.104	-181.475	-179.29
C28	-164.567	-169.176	-166.871	-190.396	-189.881	-190.138	-177.918	-178.7	-178.309
C29	-187.026	-188.807	-187.916	-191.253	-197.343	-194.298	-185.352	-189.812	-187.582
C30	N/A	N/A		N/A	N/A		N/A	N/A
C31	-182.428	-179.114	-180.771	-185.982	-185.429	-185.706	-186.215	-178.714	-182.464
n-alkane	BMC: 424			BMC: 425			BMC: 426
	Sample depth (mbsf): 37.7			Sample depth (mbsf): 16.7			Sample depth (mbsf): 57.3
	Rep 1 δD	Rep 2 δD	Mean δD	Rep 1 δD	Rep 2 δD	Mean δD	Rep 1 δD	Rep 2 δD	Mean δD
C23	N/A	N/A		N/A	N/A		-154.832	-150.397	-152.614
C24	N/A	N/A		N/A	N/A		-154.31	-158.065	-156.188
C25	-145.794	-141.51	-143.652	N/A	N/A		-177.229	-176.037	-176.633
C26	N/A	N/A		N/A	N/A		-163.004	-161.205	-162.105
C27	-156.757	-157.08	-156.918	-150.471	-152	-151.236	-182.764	-188.125	-185.445
C28	-153.152	-149.876	-151.514	N/A	N/A		-163.188	-151.346	-157.267
C29	-185.782	-186.094	-185.938	-152.295	-151.881	-152.088	-187.742	-185.24	-186.491
C30	N/A	N/A		N/A	N/A		N/A	N/A
C31	-179.59	-187.593	-183.591	-149.231	-150.517	-149.874	-183.255	-169.873	-176.564
n-alkane	BMC: 427			BMC: 428			Sample: 429
	Sample depth (mbsf): 103.3			Sample depth (mbsf): 248.2			Sample depth (mbsf): 208.7
	Rep 1 δD	Rep 2 δD	Mean δD	Rep 1 δD	Rep 2 δD	Mean δD	Rep 1 δD	Rep 2 δD	Mean δD
C23	-173.128	-177.56	-175.344	N/A	N/A		N/A	N/A
C24	-177.109	-172.911	-175.01	N/A	N/A		-157.096	-155.726	-156.411
C25	-180.759	-180.113	-180.436	-170.528	-169.814	-170.171	-165.708	-167.877	-166.793
C26	-179.101	-188.883	-183.992	-151.723	-150.626	-151.175	-154.242	-163.397	-158.82
C27	-184.976	-180.004	-182.49	-176.657	-175.623	-176.14	-181.22	-180.187	-180.704
C28	-185.182	-164.223	-174.702	-161.34	-162.109	-161.725	-170.159	-167.187	-168.673
C29	-199.073	-197.654	-198.363	-192.167	-190.939	-191.553	-187.879	-188.396	-188.137
C30	N/A	N/A		N/A	N/A		N/A	N/A
C31	-197.457	-210.47	-203.964	-190.891	-190.023	-190.457	-179.255	-180.829	-180.042

## Sheet: CSI summary
Supplementary data table 4: n-alkane compound specific isotope summary
		Carbon δ13C										Hydrogen
Depth (mbsf)	Age (Ma)	n-C23	n-C25	n-C27	n-C29	n-C31	Average δ13C of n-C25-n-C31	Standard deviation of average δ13C of n-C25-n-C31	δ13Catm 0.5myr running mean from Tipple et al. 2010	δ13CTT	Δ Carbon isotope discrimination	n-C23	n-C25	n-C27	n-C29	n-C31	Average δ2H of n-C25-n-C31	Standard deviation of average δ2H of n-C25-n-C31
27.8	19.7978		-28.1379	-29.0617	-30.0708		-29.0901	0.789338	-6.12297	-25.3876	19.7665			-168.407	-190.937	-185.011	-181.452	9.53567
37.7	19.8857	-28.8748	-28.1107	-29.5555	-30.2844	-30.561	-29.6279	0.94987	-6.11594	-25.9254	20.3367		-143.652	-156.918	-185.938	-183.591	-167.525	17.8857
47.8	19.9754		-28.2178	-29.4751	-30.2193	-30.2197	-29.533	0.81787	-6.10637	-25.8305	20.2471	-183.341	-193.712	-190.639	-204.558	-202.134	-197.761	5.75411
57.3	20.0598	-29.7389	-28.9402	-30.1206	-31.2526	-31.4283	-30.4354	0.998537	-6.08652	-26.7329	21.2135	-152.614	-176.633	-185.445	-186.491	-176.564	-181.283	4.69928
66.8	20.1442	-28.5646	-28.499	-29.3956	-30.1032		-29.3326	0.656427	-6.07387	-25.6301	20.0706	-150.996	-177.606	-178.292	-198.413	-183.543	-184.463	8.37477
83.2	20.3017	-30.6153	-26.8539	-29.081	-29.1795		-28.3714	1.07383	-6.11683	-24.6689	19.0213		-156.327	-173.796	-188.407	-184.813	-175.836	12.4837
94.2	20.4145	-28.7449	-28.7308	-30.0405	-30.4702		-29.7472	0.739772	-6.14759	-26.0447	20.4292		-175.736	-181.996	-190.525	-202.112	-187.592	9.89096
103.3	20.5078	-28.0572	-28.9957	-30.3284	-30.3866		-29.9036	0.642399	-6.22901	-26.2011	20.5094	-175.344	-180.436	-182.49	-198.363	-203.964	-191.313	10.0735
112.8	20.6052	-28.7161	-29.0472	-30.0416	-30.3712	-29.8782	-29.8346	0.488014	-6.26807	-26.1321	20.397	-186.976	-188.226	-192.621	-206.411	-207.258	-198.629	8.3571
122.3	22.9304	-28.8968	-29.6039	-30.2792	-30.4637	-31.283	-30.4075	0.598328	-5.77087	-26.705	21.5085	-183.125	-174.38	-179.425	-176.907	-188.726	-179.859	5.42077
132.7	22.9748	-29.5605	-30.2288	-30.4468	-31.1841	-30.6306	-30.6226	0.354031	-5.7761	-26.9201	21.7289	-167.284	-178.428	-189.935	-197.613	-197.793	-190.942	7.89078
141.7	23.0131	-27.6173	-29.8258	-30.3076	-31.5006	-30.5966	-30.5577	0.610062	-5.75018	-26.8552	21.6874	-179.337	-181.132	-173.843	-182.47	-189.845	-181.822	5.67736
146.2	23.0323	-29.262	-30.2877	-30.6022	-31.3065	-30.5569	-30.6883	0.376585	-5.83338	-26.9858	21.7391	-169.64	-177.365	-177.537	-194.697	-174.106	-180.926	8.06715
153.2	23.8135		-29.2992	-30.2474	-31.491	-30.6898	-30.4318	0.791396	-5.83764	-26.7293	21.4655	-173.705	-175.12	-172.233	-188.459	-179.464	-178.819	6.1322
160.3	23.8437	-29.7801	-29.6441	-30.103	-30.9365	-30.6681	-30.3379	0.500945	-5.83608	-26.6354	21.3685		-162.266	-179.29	-187.582	-182.464	-177.901	9.49906
173.7	23.9008		-27.7209	-29.8845	-30.229	-30.1925	-29.5067	1.03968	-5.82132	-25.8042	20.5122	-145.685	-187.772	-183.962	-200.71	-198.76	-192.801	7.09733
183.2	23.9413		-28.206	-30.2631	-30.4637	-29.3033	-29.559	0.895843	-5.88494	-25.8565	20.5017			-163.19	-179.426	-189.798	-177.471	10.9507
194.8	23.9908	-29.395				-28.3565	-28.3565	0	-5.92778	-24.654	19.1996
200.2	24.3012			-30.297	-29.8772		-30.0871	0.209873	-6.0192	-26.3846	20.9173		-155.731	-178.286	-187.916	-180.771	-175.676	12.046
208.7	24.3374	-29.8163	-27.7861	-29.2039	-29.7202		-28.9034	0.817695	-6.02682	-25.2009	19.6698		-166.793	-180.704	-188.137	-180.042	-178.919	7.68893
236.3	24.4551		-27.4637	-29.3873	-29.0854	-29.0878	-28.756	0.756183	-6.04505	-25.0535	19.497		-166.702	-179.91	-196.481	-174.608	-179.425	10.9111
248.2	24.7772	-29.6045	-27.3216	-28.8527	-28.5904	-25.954	-27.6797	1.15232	-5.99508	-23.9772	18.4238		-170.171	-176.14	-191.553	-190.457	-182.08	9.17905
259.2	24.8241	-28.4342	-27.4537	-28.5808	-27.6504		-27.895	0.49156	-5.98169	-24.1925	18.6623		-171.771	-185.307	-189.912	-181.979	-182.242	6.66973
269.7	24.8689	-28.7071	-27.3734	-29.0277	-27.9021		-28.1011	0.689857	-5.97154	-24.3986	18.8879	-175.115	-177.779	-184.924	-192.478	-180.416	-183.899	5.57294
283.8	24.929	-28.2532	-26.7566	-28.2437	-27.1881		-27.3962	0.624686	-5.99558	-23.6937	18.1276	-170.763	-175.564	-186.841	-194.298	-185.706	-185.602	6.6695
296.7	24.9839	-28.774	-27.3616	-29.3429	-28.0089	-25.8507	-27.641	1.25649	-6.01757	-23.9385	18.3605		-165.097	-184.089	-195.276	-198.323	-185.696	13.0203
307.3	25.1514	-28.365	-26.9637	-28.7006	-27.3083		-27.6576	0.750831	-6.24454	-23.9551	18.1452	-169.751	-174.689	-191.441	-202.947	-204.827	-193.476	11.9962
318.7	25.2196	-27.3644	-26.6484	-28.3196	-27.1156	-25.7887	-26.9681	0.91398	-6.29269	-23.2656	17.3772	-166.457	-184.62	-181.787	-192.882	-179.45	-184.685	5.07401
331.3	25.3215	-28.1702	-27.1966	-28.3355	-27.2341	-25.3985	-27.0412	1.05298	-6.25012	-23.3387	17.4969	-162.906	-177.267	-184.655	-193.058	-187.656	-185.659	5.70442
345.3	25.4401	-29.5112	-27.606	-29.7077	-28.155	-25.8484	-27.8293	1.37917	-6.18494	-24.1268	18.3854	-156.909	-182.513	-196.272	-202.146	-193.282	-193.553	7.1272
